# Supplementary material for: The relationship between cancer associated fibroblasts biomarkers and prognosis of breast cancer: a systematic review and meta-analysis
Source: PeerJ. 2024 Feb 23;12:e16958. doi: 10.7717/peerj.16958 (PMC10896086; doi:10.7717/peerj.16958)
Supplement: Supplemental Information 4 [file peerj-12-16958-s004.xlsx]

## Sheet: Sheet1
Title	Author	Year	Patient surgery time	Type of tumor	Patients’ No	Tumor stage	Cut-off value	fibroblast: (H/L)	Marker	Median follow-up (months)	Clinical outcome	Univariate			Multivariate			Quality score (NOS)	Function
												HR	95% CIs	Pvalue	HR	95% CIs	Pvalue
SPARC in cancer-associated fibroblasts is an independent poor prognostic factor in non-metastatic triple-negative breast cancer and exhibits pro-tumor activity	Alcaraz, L. B. Mallavialle, A. Mollevi, C. Boissière-Michot, F. Mansouri, H. Simony-Lafontaine, J. Laurent-Matha, V. Chardès, T. Jacot, W. Turtoi, A. Roger, P. Guiu, S. Liaudet-Coopman, E.	2023	2002 - 2012	non-metastatic triple-negative breast cancer	126	T1-T4,N0-N3	≥ 50% of stained cells	111/15	SPARC	NR	RFS	5.09	0.70-37.18	0.034	6.17	0.84-45.2	0.015		HMF-secreted SPARC inhibits adhesion and promotes motility, wound healing and invasion of MDA-MB-231 TNBC cells, highlighting its pro-tumor role
Alpha-smooth muscle actin-positive cancer-associated fibroblasts secreting osteopontin promote growth of luminal breast cancer	Muchlińska, A.	2022	2011–2013	nonmetastatic breast cancers (luminal breast cancer)	85	stageⅠ-Ⅲ	index score higher than the upper quartile (Q3) of the whole group	11/74	α-SMA	NR	OS	4.734	1.127-19.891	0.019				7	α-SMAhigh CAFs CM promote cancer cell proliferation；OPN secreted by α‑SMAhigh CAFs induces lumBC cell colony growth
Disruption of the pentraxin 3/CD44 interaction as an efficient therapy for triple-negative breast cancers	Hsiao, Y. W.	2022	1997-2002	TNBC	11	stageⅠ-Ⅲ	H-score ≧ medium	10/1	CEBPD	NR	DSS				5.625	(0.568–55.651)	0.14		higher levels of CEBPD and PTX3 in the CAFs of the TME were significantly and positively associated with nodal metastasis (p = .006 and <.001, respectively) and poor disease-specific survival
	Hsiao, Y. W.	2022		TNBC	11	stageⅠ-Ⅲ	H-score ≧ medium	10/1	PTX3		DSS				4.484	(0.317–63.487)	0.267
	Hsiao, Y. W.	2022		TNBC	28	stageⅠ-Ⅲ	H-score ≧ medium	23/5	CEBPD		MeFS				3.173	(1.085–9.277)	0.035
	Hsiao, Y. W.	2022		TNBC	28	stageⅠ-Ⅲ	H-score ≧ medium	26/2	PTX3		MeFS				8.324	(1.589–43.608)	0.012		. Conditioned media from BCAFs exogenously expressing CEBPD or TGF-β1-treated BCAFs could enhance the migration and invasion of MDA-MB-231 cells,PTX3 is responsive to TGF-β1-induced CEBPD in BCAFs and contributes to promoting the migration, invasion and stemness of TNBC MDA-MB-231 cells.
High AUF1 level in stromal fibroblasts promotes carcinogenesis and chemoresistance and predicts unfavorable prognosis among locally advanced breast cancer patients	Al-Tweigeri, T.	2022	2006-2013	locally advanced breast cancer（LABC）	338	T2≥4 cm, T3 or T4, N0-N2, M0	≥ 10% of the stroma /HPF	86/252	AUF1	median follow-up time of 52. 6 months	OS	0.544	0.333–0.889	0.0151	0.95	(0.334–0.950)	0.0315		AUF1 positivity in cancer cells showed association with poor OS and DFS of ER+/Her2+ patients ； This suggests that breast fibroblasts that express high level of AUF1 can enhance the EMT process in BC cells in a paracrine manner；BSFs that express high level of AUF1 have the capacity to promote EMT and stemness, two pro-metastatic processes, in breast cancer cells both ER+ and ER−. BSFs that expres…
	Al-Tweigeri, T.	2022		locally advanced breast cancer	338	T2≥4 cm, T3 or T4, N0-N2, M0	≥ 10% of the stroma /HPF	86/252	AUF1	median follow-up time of 52. 6 months	DFS	0.705	0.484–1.026	0.0677	0.634	(0.634–0.426)	0.0249
High DNMT1 Expression in Stromal Fibroblasts Promotes Angiogenesis and Unfavorable Outcome in Locally Advanced Breast Cancer Patients	Al-Kharashi, L. A.	2022	2006- 2013	locally advanced breast cancer	100	T2-T4,Tx	≥ 10% of the stroma /HPF	68/32	DNMT1	median fellow up time of 52. 6 months	OS	0.421	0.141-1.255	0.01204	0.661	(0.119-3.673)	0.036		the role of DNMT1 in promoting the paracrine proangiogenic effect of breast stromal fibroblasts in vivo.
	Al-Kharashi, L. A.	2022		locally advanced breast cancer	100	T2-T4,Tx	≥ 10% of the stroma /HPF	68/32	DNMT1	median fellow up time of 52. 6 months	DFS	0.581	0.353-0.955	0.0322	0.426	(0.308-0.998)	0.0492
Prognostic significance of PD-L1-positive cancer-associated fibroblasts in patients with triple-negative breast cancer	Yoshikawa, K.	2021	2006 -2018	TNBC	61	N0-N3	the presence of CAFs with staining intensities of + 1 and + 2 in more than 1% of a section and positive immunoreactivity of ≥1 from the same patient	34/27	PD-L1（low）	NR	OS	0.297	0.093–0.948	0.04	0.198	0.044–0.891	0.035		CAF PD-L1 expression was an independent factor for a better prognosis of patients with TNBC
Metastasis Risk Assessment Using BAG2 Expression by Cancer-Associated Fibroblast and Tumor Cells in Patients with Breast Cancer	Yoon, C. I.	2021	1992 - 2015	BC	310	stageⅠ-Ⅲ	IHC score 1+ to 3+	67/243	BAG2	median fellow up time of 111 (6-325) months	DMFS	1.788	1.021–3.133	0.042	1.584	(0.886–2.832)	0.121		Positive BAG2 expression in CAF was significantly associated with decreased DMFS
Podoplanin expression in cancer-associated fibroblasts predicts unfavorable prognosis in node-negative breast cancer patients with hormone receptor-positive/HER2 - negative subtype	Tanaka, Y.	2021	2008-2014	HR + /HER2- Lymph node negative invasive carcinoma	304	NR	more than 10% of CAFs showed immunoreactivity with podoplanin as strong as that of internal positive controls	27/142	PDPN	median fellow up time of 80.0(5-143) months	DFS	3.38	1.310–8.722	0.012				7	podoplanin-positive status in CAFs correlated with shorter disease-free survival (DFS)
	Tanaka, Y.	2021		HR + /HER2- Lymph node negative invasive carcinoma	304	NR	more than 11% of CAFs showed immunoreactivity with podoplanin as strong as that of internal positive controls	27/142	PDPN	median fellow up time of 80.0 (5-143) months	DSS	27.016	3.249–224.658	0.002	37.759	3.363–423.93	0.003
Breast cancer stromal clotting activation (Tissue Factor and thrombin): A pre-invasive phenomena that is prognostic in invasion	Shaker, H.	2020	August 2010 and July 2014.	invasive breast cancer	182	NR	Fibroblast expression > 80%	34/148	Tissue Factor(TF)	Median follow-up from diagnosis was 62 (range 8-80) months	OS	1.05	1.007 – 1.09	0.02	1.035	(1.001 – 1.07)	0.041
	Shaker, H.	2020		invasive breast cancer	137	NR	Fibroblast expression > 70%	34/103	Thrombin	Median follow-up from diagnosis was 62 (range 8-80) months	OS	1.02	0.99-1.04	0.21	1.02	0.98-1.02)
	Shaker, H.	2020		invasive breast cancer	172	NR	Fibroblast expression > 60%	61/111	PAR1	Median follow-up from diagnosis was 62 (range 8-80) months	OS	1.2	0.42-3.73	0.68	1.003	(0.98-1.02	0.76		fibroblast expression was associated with reduced OS (P = .02) and DFS (P = .04).
	Shaker, H.	2020		invasive breast cancer	172	NR	Fibroblast expression > 60%	75/97	PAR2	Median follow-up from diagnosis was 62 (range 8-80) months	OS	1.06	0.34-3.29	0.91	0.99	(0.971-1.02)
Clinical and functional significance of tumor/stromal ATR expression in breast cancer patients	Al-Ansari, M. M.	2020	2006-2013	locally advanced breast cancer	103	T2-T4,Tx	Immunostaining positive cells＞11%	NR	ATR（low）	median fellow up time of 52.6 months	OS	7.934	2.950–21.340	0.0001	14.708	2.693–80.332	0.0019		t absence or reduced ATR expression in tumoral cells and their adjacent stromal fibroblasts is correlated with poor overall survival as well as disease-free survival
	Al-Ansari, M. M.	2020		locally advanced breast cancer	103	T2-T4,Tx	Immunostaining positive cells＞11%	NR	ATR（low）	median fellow up time of52.6 months	DFS	0.406	0.198–0.833	0.014	0.369	0.151–0.900	0.0285		This pro-proliferative effect of ATR-deficient cells was confirmed by immunostaining showing an increase in the staining of Ki-67 and cyclin D1 in the epithelium adjacent to N64-sh cells as compared to control
Impact of Epithelial-Stromal Interactions on Peritumoral Fibroblasts in Ductal Carcinoma in Situ	Strell, C.	2019	1986 and 2004	DCIS	351	NR	IHC score > 2	68/283	PDGFR-α	NR	DFS	0.85	0.49 -1.49	0.57	0.95	(0.51 - 1.77)	0.87	7	the PDGFRa(low)/PDGFRb(high) subset showed a statistically significantly worse prognosis
Impact of Epithelial-Stromal Interactions on Peritumoral Fibroblasts in Ductal Carcinoma in Situ	Strell, C.	2019		DCIS	360	NR	IHC score > 2	202/158	PDGFR-β	NR	DFS	1.37	0.90-2.08	0.14	1.41	(0.88 - 2.24)	0.15
MMP11 expression in intratumoral inflammatory cells in breast cancer	Eiro, N.	2019	1991 and 2012	invasive breast carcinoma	246	T1 or T2	>10% positive cells	175/71	MMP11	a minimum follow-up of ten years	RFS	3.01	1.84-4.92	＜0.001				8	MMP11 expression in stromal cells was significantly associated with prognosis
Cancer-Associated Fibroblasts Correlate with Tumor-Associated Macrophages Infiltration and Lymphatic Metastasis in Triple Negative Breast Cancer Patients	Zhou, J.	2018	-2016	TNBC	278	NR	Immunostaining intensity × Response rate score 2-9	146/132	FAP	median fellow up time of 87 (range 8-130) months	DFS				2.501	1.532-4.082	0.003	7	Compared with those with low expressions of CAFs markers, patients with high expressions had a disadvantageous DFS and DSS (P<0.001).
	Zhou, J.	2018		TNBC	278	NR	Immunostaining intensity × Response rate score 2-9	146/132	FAP	median fellow up time of 87(range 8-130) months	DSS				3.044	1.799-5.151	<0.001
	Zhou, J.	2018		TNBC	278	NR	Immunostaining intensity × Response rate score 2-9	140/138	α-SMA	median fellow up time of 87(range 8-130) months	DFS				2.477	1.218-5.037	0.01
	Zhou, J.	2018		TNBC	278	NR	Immunostaining intensity × Response rate score 2-9	140/138	α-SMA	median fellow up time of 87(range 8-130) months	DSS				2.831	1.373-5.837	0.003
Tenascin C is a prognostic determinant and potential cancer-associated fibroblasts marker for breast ductal carcinoma	Yang, Z.	2017		breast ductal carcinoma	150	NR	IHC score 2-3	84/66	TNC	median fellow up time of 68(range 2-108) months	OS	10.253	3.658–28.739	<0.001	8.478	2.956–24.320	<0.001	8	TNC and CAF markers (FSP1, SMA, Vimentin) positive expression was significantly shorter than negative group
	Yang, Z.	2017		breast ductal carcinoma	150	NR	IHC score 2-3	96/54	Vimentin	median fellow up time of 68(range 2-108) months	OS	0.67	0.31-1.42	0.049
	Yang, Z.	2017		breast ductal carcinoma	150	NR	IHC score 2-3	58/92	FSP-1	median fellow up time of 68(range 2-108) months	OS	0.44	0.22-0.88	<0.001
	Yang, Z.	2017		breast ductal carcinoma	150	NR	IHC score 2-3	108/42	α-SMA	median fellow up time of 68(range 2-108) months	OS	0.39	0.14-1.09	0.002
CD61+ and CAF+ were found to be good prognosis factors for invasive breast cancer patients	Cai, D.	2017	2007-2008	invasive breast cancer	164	stage Ⅰ-Ⅲ	≥ 10% of the fibromatous tumor stroma	72/92	PDPN	median fellow up time of 42(range 1-84)	DFS				3.928	1.517-10.169	0.005	7
High ASMA(+) Fibroblasts and Low Cytoplasmic HMGB3(+) Breast Cancer Cells Predict Poor Prognosis	Amornsupak, K.	2017	2006-2011	invasive ductal carcinoma (IDC)	66	NR	IHC score ≥3	39/27	α-SMA	fellow up time of range 65.23-87.7 months	MFS	13.048	1.721-98.892	0.013	9.891	1.094-89.432	0.041	8	The MFS of patients with high ASMA expression was significantly lower than that of patients with low ASMA expression. ASMA expression could be considered as an independent prognostic factor of metastatic relapse in patients with breast cancer
Prognostic significance of S100A4-expression and subcellular localization in early-stage breast cancer	Egeland, E.V.	2016	1995–1998	Early-stage breast cancer	291	pT1N0- or pT2pN0G1	IHC >1% stained tumor cells	44/247	FSP-1	Median follow-up for 88.8 months (range 7.2–124.8)	MFS	0.37	0.17-0.79	0.321				8	S100A4-positive patients having significantly inferior outcome
	Egeland, E.V.	2016		Early-stage breast cancer	291	pT1N0- or pT2pN0G1	IHC >1% stained tumor cells	44/247	FSP-1	Median follow-up for 88.8 months (range 7.2–124.8)	OS	0.44	0.24-0.82	0.12
Expression of cancer-associated fibroblast-related proteins differs between invasive lobular carcinoma and invasive ductal carcinoma	Park, C. K.	2016	January 2000 to December 2012	invasive breast cancer	524	NR	IHC score ≥ 2	101/423	PDPN	NR	OS				2.103	0.888–4.980	0.091	8	higher T stage (hazard ratio 4.057, 95 % CI 1.683–9.779, p = 0.002), tumoral FSP-1/S100A4 positivity (hazard ratio 3.462, 95 % CI 1.414–8.479, p = 0.007), and stromal FSP-1/S100A4 negativity (hazard ratio 2.465, 95 % CI 1.113–5.461, p = 0.026) were independent factors associated with shorter DFS.
	Park, C. K.	2016		invasive breast cancer	524	NR	IHC score ≥ 2	101/423	PDPN	NR	DFS				3.462	1.414–8.479	0.007
	Park, C. K.	2016		invasive breast cancer	524	NR	IHC score ≥ 2	340/184	FSP-1	NR	DFS				2.465	1.113–5.461	0.026
	Park, C. K.	2016		invasive breast cancer	524	NR	IHC score ≥ 2	340/184	FSP-1	NR	OS				0.576	0.272–1.217	0.576
	Park, C. K.	2016		invasive breast cancer	642	NR	IHC score ≥ 2	153/489	PDGFR-β	NR	OS				1.71	(0.23-12.63)	0.448
	Park, C. K.	2016		invasive breast cancer	642	NR	IHC score ≥ 2	153/489	PDGFR-β	NR	DFS				1.72	(0.25-12.14)	0.528
Expression of CAF-Related Proteins Is Associated with Histologic Grade of Breast Phyllodes Tumor	Kim, H. M.	2016	2000 to 2010	Malignant phyllodes tumor	16	NR	IHC score > 1	10/6	PDGFR-β	NR	OS	0.03	0.00-128.68	0.041				8	stromal expression of PDGFR𝛼 was associated with shorter overall survival
	Kim, H. M.	2016		Phyllodes tumor	349	NR	IHC score > 1	17/179	PDGFR-α	NR	OS	0.19	0.04-1.01	0.002				7
	Kim, H. M.	2016		Malignant phyllodes tumor	16	NR	IHC score > 1	5/11	PDGFR-α	NR	OS	0.44	0.03-6.15	0.052
Prognostic significance of inflammatory factors expression by stroma from breast carcinomas	Fernandez-Garcia, B.	2016	1990-2001	early invasive breast cancer of ductal-type	98	T1 or T2	≥ 10% of the stroma /HPF	77/21	IL1(low)	The median follow-up period in patients without metastasis was of 138 months and 26 months in patients with metastatic disease.	OS	0.29	0.11-0.73	0.007
	Fernandez-Garcia, B.	2016		early invasive breast cancer of ductal-type	98	T1 or T2	≥ 10% of the stroma /HPF	77/21	IL1(low)	The median follow-up period in patients without metastasis was of 138 months and 26 months in patients with metastatic disease.	RFS	0.38	0.19-0.75	0.002
	Fernandez-Garcia, B.	2016		early invasive breast cancer of ductal-type	101	T1 or T2	≥ 10% of the stroma /HPF	57/44	IL10	The median follow-up period in patients without metastasis was of 138 months and 26 months in patients with metastatic disease.	OS	0.7	0.15-3.18	<0.001
	Fernandez-Garcia, B.	2016		early invasive breast cancer of ductal-type	101	T1 or T2	≥ 10% of the stroma /HPF	57/44	IL10	The median follow-up period in patients without metastasis was of 138 months and 26 months in patients with metastatic disease.	RFS	0.54	0.19-1.52	<0.001
Differential expression of cancer-associated fibroblast-related proteins according to molecular subtype and stromal histology in breast cancer	Park, S. Y.	2015	January 2000 to December 2006.	Breast cancer	642	T1-T3	IHC score ≥ 2	153/489	PDGFR-β	NR	OS	1.31	0.31-5.57					8
	Park, S. Y.	2015		Breast cancer	642	T1-T3	IHC score ≥ 2	153/489	PDGFR-β	NR	DFS	1.54	0.33-7.32
	Park, S. Y.	2015		Luminal B	152	T1-T3	IHC score ≥ 2	5/147	FAP-α	NR	OS	0.01	0.00-3.52	0.018
	Park, S. Y.	2015		Invasive breast cancer	642	T1-T3	IHC score ≥ 2	189/453	FSP-1	NR	OS	0.5	0.24-1.02	0.016
	Park, S. Y.	2015		Invasive breast cancer	642	T1-T3	IHC score ≥ 2	189/453	FSP-1	NR	DFS	0.98	0.46-2.11	0.015
	Park, S. Y.	2015		Luminal A	275	T1-T3	IHC score ≥ 2	40/235	PDPN	NR	OS	0.16	0.02-1.57	0.002
CD105 Expression on CD34-Negative Spindle-Shaped Stromal Cells of Primary Tumor Is an Unfavorable Prognostic Marker in Early Breast Cancer Patients	Martinez, L. M.	2015		Early-stage breast cancer	53	NR	≥ 10% of the stroma /HPF	23/30	FSP-1	NR	OS	0.32	0.01-10.42	0.04				6
Expression of cancer-associated fibroblast-related proteins in adipose stroma of breast cancer	Jung, Y. Y.	2015	January 1, 2000 and December 31, 2006	invasive ductal carcinoma	642		IHC score ≥ 2	23/619	PDGFR-β	68.3 ± 30.1	OS	1.68	0.27-10.65	0.729				7	Similar univariate analysis for breast cancer of fibrous stroma type identified tumor S100A4 positivity (p=0.015 and p= 0.016, respectively) to be significantly associated with shorter DFS and OS (Table 4 and Fig. 4).
	Jung, Y. Y.	2015		invasive ductal carcinoma	642		IHC score ≥ 2	23/619	PDGFR-β	68.3 ± 30.1	DFS	1.74	0.27-11.18	0.799
	Jung, Y. Y.	2015		invasive ductal carcinoma	642	stageⅠ-Ⅲ	IHC score ≥ 2	189/453	FSP-1	68.3 ± 30.1	OS	2.26	1.29-3.95	0.331
	Jung, Y. Y.	2015		invasive ductal carcinoma	642	stageⅠ-Ⅲ	IHC score ≥ 2	189/453	FSP-1	68.3 ± 30.1	DFS	2.53	1.40-4.59	0.371
A phenotype from tumor stroma based on the expression of metalloproteases and their inhibitors, associated with prognosis in breast cancer	Eiró, N.	2015		primary invasive ductal carcinoma	107	T1 or T2	≥ 10% of the stroma /HPF	46/61	TIMP-2	The median follow-up period in patients without metastasis was of 187 months, and 52 months in patients with metastatic disease.	RFS	5.1	3-8.8	<0.0001				7
	Eiró, N.	2015		primary invasive ductal carcinoma	107	T1 or T2	≥ 10% of the stroma /HPF	46/61	TIMP-2	The median follow-up period in patients without metastasis was of 187 months, and 52 months in patients with metastatic disease.	OS	4.4	2.3-8.2	<0.0001
	Eiró, N.	2015		primary invasive ductal carcinoma	106	T1 or T2	≥ 10% of the stroma /HPF	74/32	MMP11	The median follow-up period in patients without metastasis was of 187 months, and 52 months in patients with metastatic disease.	RFS	4	2-2.8	<0.0001
	Eiró, N.	2015		primary invasive ductal carcinoma	106	T1 or T2	≥ 10% of the stroma /HPF	74/32	MMP11	The median follow-up period in patients without metastasis was of 187 months, and 52 months in patients with metastatic disease.	OS	4	1.9-10	<0.0001
	Eiró, N.	2015		primary invasive ductal carcinoma	107	T1 or T2	≥ 10% of the stroma /HPF	57/50	MMP13	The median follow-up period in patients without metastasis was of 187 months, and 52 months in patients with metastatic disease.	RFS	1.7	1.04-3	<0.05
	Eiró, N.	2015		primary invasive ductal carcinoma	107	T1 or T2	≥ 10% of the stroma /HPF	57/50	MMP13	The median follow-up period in patients without metastasis was of 187 months, and 52 months in patients with metastatic disease.	OS	1.5	0.8-2.7	<0.05
	Eiró, N.	2015		primary invasive ductal carcinoma	107	T1 or T2	≥ 10% of the stroma /HPF	17/90	MMP9	The median follow-up period in patients without metastasis was of 187 months, and 52 months in patients with metastatic disease.	RFS	3.3	1.9-6	<0.0001
	Eiró, N.	2015		primary invasive ductal carcinoma	107	T1 or T2	≥ 10% of the stroma /HPF	17/90	MMP9	The median follow-up period in patients without metastasis was of 187 months, and 52 months in patients with metastatic disease.	OS	3.9	2-7.8	<0.0001
TGF-beta receptor type-2 expression in cancer-associated fibroblasts regulates breast cancer cell growth and survival and is a prognostic marker in pre-menopausal breast cancer	Busch, S.	2015	1986 to 1991	invasive breast cancer	123	NR	IHC score ≥ 2	81/42	TGFBR2(low)	NR	RFS	0.581	0.357-0.946	0.029	0.534	0.360-0.793	0.002		Low TGFBR2 expression in CAFs is associated with shortened recurrence-free survival in breast cancer.tumour growth is enhanced in the presence of TGFBR2 knockdown fibroblasts.
	Busch, S.	2015		invasive breast cancer	161	NR	IHC score ≥ 2	124/37	pSMAD2	NR	RFS	0.916	0.534-1.570	0.749
Absence of caveolin-1 expression in carcinoma-associated fibroblasts of invasive micropapillary carcinoma of the breast predicts poor patient outcome	Ren, M. J.	2014	January 2003 and August 2005	invasive micropapillary carcinoma (IMPC)	86	T1-T4,N0-N3	≥ 10% of the stroma /HPF	37/49	cavelin -1	median fellow up time of 64 (1-115) months	PFS	3.945	1.717-9.063	0.001	3.09	1.209–7.898	0.018		Absence of caveolin-1 expression in carcinoma-associated fibroblasts of invasive micropapillary carcinoma of the breast predicts poor patient outcome
Expression patterns of SDF1/CXCR4 in human invasive breast carcinoma and adjacent normal stroma: Correlation with tumor clinicopathological parameters and patient survival	Papatheodorou, H.	2014	1995 - 2006	invasive breast cancer	76	stageⅠ-Ⅳ	Immunostaining intensity score+staining percentage score 4-6		CXCR4	AverAverage follow-up time 6 months	RFS				0.72	(0.64-0.82)	1.8e-0.7
	Papatheodorou, H.	2014		invasive breast cancer	76	stageⅠ-Ⅳ	Immunostaining intensity score+staining percentage score 4-6		CXCR4	AverAverage follow-up time 6 months	OS				0.6	(0.47-0.77)	4e-0.5
Podoplanin expression in cancer-associated fibroblasts correlates with VEGF-C expression in cancer cells of invasive ductal breast carcinoma	Pula, B.	2013	1999-2002	invasive ductal breast carcinoma	104	NR	immunoreaction score ＞ 3	74/30	PDPN	followed up for 59.3 ± 38.8 months (range 1 – 125 months)	OS	2.082	0.7988 – 5.429	0.1335				6	Podoplanin expression in CAFs may have impact on angio- and lymphangiogenesis processes in IDC
Impact of different tumour stroma assessment methods regarding podoplanin expression on clinical outcome in patients with invasive ductal breast carcinoma	Pula, B.	2013	1999-2006	invasive ductal breast carcinoma	257	T1-T4,N0-N3	Immunoreactive score 6-12		PDPN	followed up for 63.21±38.54 (1-141) months.	OS	1.929	1.046-3.560	0.0355	0.6434	0.2184-1.894	0.4236	7	podoplanin expression in CAFs may be considered a possible marker of poor prognosis in IDC. higher podoplanin expression in CAFs was significantly associated with higher grade of malignancy and high proliferation rate of cancer cells measured by the expression of Ki-67 antigen.
	Pula, B.	2013		invasive ductal breast carcinoma	257	T1-T4,N0-N3	Immunoreactive score 6-12		PDPN	followed up for 63.21±38.54 (1-141) months.	EFS	0.3233	0.7860-2.075	0.3233
Diagnostic and Prognostic Relevance of MMP-11 Expression in the Stromal Fibroblast-Like Cells Adjacent to Invasive Ductal Carcinoma of the Breast	Min, K. W.	2013	2000-2005	invasive ductal breast carcinoma	192	stageⅠ-Ⅲ	Immunoreactive score >1	152/40	MMP11	NR	DFS	1.668	0.863–3.224	0.044				7	MMP-11 expression of stromal fibroblast-like cells was still significantly associated with poor prognosis
	Min, K. W.	2013		invasive ductal breast carcinoma	192	stageⅠ-Ⅲ	Immunoreactive score >1	152/40	MMP11	NR	OS	2.185	1.046–4.566	0.005
Podoplanin-expressing cancer-associated fibroblasts are associated with poor prognosis in invasive breast cancer	Schoppmann, S. F.	2012		Invasive breast cancer	367	stageⅠ-Ⅳ	≥ 10% of the stroma /HPF	33/334	PDPN	NR	OS				2.304	1.374–3.862	0.002	7
	Schoppmann, S. F.	2012		Invasive breast cancer	367	stageⅠ-Ⅳ	≥ 10% of the stroma /HPF	33/334	PDPN	NR	DFS				1.782	1.072–2.963	0.02
Role of stromal myofibroblasts in invasive breast cancer: stromal expression of alpha-smooth muscle actin correlates with worse clinical outcome	Yamashita, M. etal	2012	2000-2004	Invasive breast cancer	60	stageⅠ-Ⅲ	> 8.48 % of the spindle-shaped cells/field area	25/35	α-SMA	The average age of the patients with metastasis was 57.5 ± 15.1 years old, while those without metastasis was 56 ± 13.1 years old. The mean follow-up period was 74.8 ± 19.3 months.	OS	0.63	0.02-17.14	<0.001				6	stromal expression of alpha-smooth muscle actin correlates with worse clinical outcome. a-SMA and lymph node metastasis were identified as independent predictive factors of metastasis
	Yamashita, M. etal	2012		Invasive breast cancer	60	stageⅠ-Ⅲ	> 8.48 % of the spindle-shaped cells/field area	25/35	α-SMA	The average age of the patients with metastasis was 57.5 ± 15.1 years old, while those without metastasis was 56 ± 13.1 years old. The mean follow-up period was 74.8 ± 19.3 months.	DFS	0.3	0.04-2.23	<0.05
Low ERK phosphorylation in cancer-associated fibroblasts is associated with tamoxifen resistance in pre-menopausal breast cancer	Busch, S.	2012	1986 to 1991	Invasive breast cancer	367	N0-N3	Immunoreactive score 2-3	283/84	α-SMA	median follow-up time 69 months	RFS	1.381	0.730-2.612	0.321	2.738	1.080-6.945	0.034	7
Epithelial-mesenchymal interactions in breast cancer: evidence for a role of nuclear localized beta-catenin in carcinoma-associated fibroblasts	Verghese, E. T.	2011	1994 to 1997	BC	188	NR	Fibroblast count score 3	57/131	b-catenin	median follow-up time 108 months	OS	0.7	0.38-1.32	0.03					fibroblasts with nuclear b-catenin increase growth and invasion of breast cancer epithelial cells in vitro
	Verghese, E. T.	2011		BC	188	NR	Fibroblast count score 3	57/131	b-catenin	median follow-up time 108 months	DFS	0.51	0.22-1.15	0.025
	Verghese, E. T.	2011		grades 2 or 3 tumours	59	NR	Fibroblast count score 3	17/42	b-catenin	median follow-up time 108 months	DFS	0.09	0.00-65.01	0.85
	Verghese, E. T.	2011		grades 2 or 3 tumours	77	NR	Fibroblast count score 3	17/60	b-catenin	median follow-up time 108 months	DFS	1.52	0.55-4.19	0.5
Podoplanin expression by cancer-associated fibroblasts predicts poor outcome in invasive ductal breast carcinoma	Pula, B.	2011	1999–2002	invasive ductal carcinoma	117	T1-T4,N0-N3	≥ 10% of the stroma /HPF	96/21	PDPN	followed up for 58 ±38.55 months (range 1–125 months)	OS	0.3397	0.1365–0.8451	0.0202	0.7623	0.2666–17.2285	0.4757	8	It has recently been shown that podoplanin, a mucin-type glycoprotein, is expressed by cancer cells and cancer-associated fibroblasts (CAFs), and promotes cancer cell migration and invasiveness. podoplanin expression by CAFs was associated with poor patient outcome
	Pula, B.	2011		invasive ductal carcinoma	117	T1-T4,N0-N3	≥ 10% of the stroma /HPF	96/21	PDPN	followed up for 58 ±38.55 months (range 1–125 months)	DFS	0.5244	0.2450–1.122	0.0963
Prognostic Significance of Stromal Platelet-Derived Growth Factor beta-Receptor Expression in Human Breast Cancer	Paulsson, J.	2009	1988 -1992	Breast cancer	289	NR	IHC score 3	100/189	PDGFR-β	median follow-up time 106 (range 0 -207 months) months	RFS	1.67	1.08-2.58	0.02	1.38	(0.84-2.27)	0.2	8
Expression and prognostic significance of metalloproteases and their inhibitors in luminal A and basal-like phenotypes of breast carcinoma	Gonzalez, L. O.	2009	1990-2001	Luminal A	48	NR	IHC > median	26/22	TIMP-2	The median follow-up period was 84 months in patients without metastasis and 66 months in patients with metastasis.	RFS	4.8	1.9-11.9	<0.001				7
	Gonzalez, L. O.	2009		Basal like	48	NR	IHC > median	26/22	TIMP-2	The median follow-up period was 84 months in patients without metastasis and 66 months in patients with metastasis.	RFS	7.5	3.2-17.6	<0.001
	Gonzalez, L. O.	2009		Luminal A	48	NR	IHC > median	29/19	MMP-11	The median follow-up period was 84 months in patients without metastasis and 66 months in patients with metastasis.	RFS	4.9	1.6-14.9	<0.05
	Gonzalez, L. O.	2009		Basal like	45	NR	IHC > median	34/11	MMP-11	The median follow-up period was 84 months in patients without metastasis and 66 months in patients with metastasis.	RFS	7.3	1.7-31.7
	Gonzalez, L. O.	2009		Luminal A	48	NR	IHC > median	22/26	MMP-13	The median follow-up period was 84 months in patients without metastasis and 66 months in patients with metastasis.	RFS	2.7	1.1-6.4	<0.05
	Gonzalez, L. O.	2009		Basal like	45	NR	IHC > median	27/18	MMP-13	The median follow-up period was 84 months in patients without metastasis and 66 months in patients with metastasis.	RFS	2.2	0.9-5.3	<0.05
	Gonzalez, L. O.	2009		Luminal A	48	NR	IHC > median	4/44	MMP-9	The median follow-up period was 84 months in patients without metastasis and 66 months in patients with metastasis.	RFS	3.1	1-9.2	<0.05
	Gonzalez, L. O.	2009		Basal like	45	NR	IHC > median	10/35	MMP-9	The median follow-up period was 84 months in patients without metastasis and 66 months in patients with metastasis.	RFS	3.9	1.7-8.8	<0.05
Tumor-derived Matrix Metalloproteinase-13 (MMP-13) correlates with poor prognoses of invasive breast cancer	Zhang, B.	2008		Invasive breast cancer	257	N0-N3	SI≥6	125/132	MMP-13	followed up for at least 36 months, up to 173 months	OS	0.995	0.786–1.259	0.146				7
Occurence of stromal myofibroblasts in the invasive ductal breast cancer tissue is an unfavourable prognostic factor	Surowiak, P. etal	2007	1997 to 1998	invasive ductal carcinoma	45	T1-T2,N0-N3,M0	IHC score 2-3	28/17	α-SMA	followed up≥ 96 months	DFS	6.28	1.08-36.36	0.0399				7
	Surowiak, P. etal	2007		invasive ductal carcinoma	45	T1-T2,N0-N3,M0	IHC score 2-3	28/17	α-SMA	followed up≥ 96 months	OS	1.23	0.17-0.79	0.0122
Stromal expression of fibroblast activation protein/seprase, a cell membrane serine proteinase and gelatinase, is associated with longer survival in patients with invasive ductal carcinoma of breast	Ariga, N.	2001	1984–1989	invasive ductal carcinoma	112	NR	≥ 10% of the stroma /HPF	61/51	FAP	NR	OS				0.19	0.05–0.67	0.01	6	Univariate analysis revealed that more abundant stromal expression of FAP/seprase was associated with longer overall and disease-free survival rates in patients with lymph node metastasis (Fig. 4c,d). , invasive ductal carcinomas with fewer stromal reactions expressing FAP/seprase may be more aggressive.
Stromal expression of fibroblast activation protein/seprase, a cell membrane serine proteinase and gelatinase, is associated with longer survival in patients with invasive ductal carcinoma of breast	Ariga, N.	2001		invasive ductal carcinoma	112		≥ 10% of the stroma /HPF	61/51	FAP		DFS				0.3	0.13–0.68	0.004

## Sheet: Sheet2
title	Author	Year	Patient surgery time	Type of tumor	Patients’ No	Tumor stage	Cut-off value	fibroblast: (H/L)	Marker	Median follow-up (months)	Clinical outcome	Univariate			Quality score (NOS)	Multivariate			Function
												HR	95% CIs	Pvalue		HR	95% CIs	Pvalue
SPARC in cancer-associated fibroblasts is an independent poor prognostic factor in non-metastatic triple-negative breast cancer and exhibits pro-tumor activity	Alcaraz, L. B. Mallavialle, A. Mollevi, C. Boissière-Michot, F. Mansouri, H. Simony-Lafontaine, J. Laurent-Matha, V. Chardès, T. Jacot, W. Turtoi, A. Roger, P. Guiu, S. Liaudet-Coopman, E.	2023	2002 - 2012	non-metastatic triple-negative breast cancer	126	T1-T4,N0-N3	≥ 50% of stained cells	111/15	SPARC	NR	RFS	5.09	0.70-37.18	0.034		6.17	0.84-45.2	0.015	HMF-secreted SPARC inhibits adhesion and promotes motility, wound healing and invasion of MDA-MB-231 TNBC cells, highlighting its pro-tumor role
Alpha-smooth muscle actin-positive cancer-associated fibroblasts secreting osteopontin promote growth of luminal breast cancer	Muchlińska, A.	2022	2011–2013	nonmetastatic breast cancers (luminal breast cancer)	85	stageⅠ-Ⅲ	index score higher than the upper quartile (Q3) of the whole group	11/74	α-SMA	NR	OS	4.734	1.127-19.891	0.019	7				α-SMAhigh CAFs CM promote cancer cell proliferation；OPN secreted by α‑SMAhigh CAFs induces lumBC cell colony growth
Disruption of the pentraxin 3/CD44 interaction as an efficient therapy for triple-negative breast cancers	Hsiao, Y. W.	2022	1997-2002	TNBC	11	stageⅠ-Ⅲ	H-score ≧ medium	45200	CEBPD	NR	DSS					5.625	(0.568–55.651)	0.14	higher levels of CEBPD and PTX3 in the CAFs of the TME were significantly and positively associated with nodal metastasis (p = .006 and <.001, respectively) and poor disease-specific survival
	Hsiao, Y. W.	2022		TNBC	11	stageⅠ-Ⅲ	H-score ≧ medium	45200	PTX3		DSS					4.484	(0.317–63.487)	0.267
	Hsiao, Y. W.	2022		TNBC	28	stageⅠ-Ⅲ	H-score ≧ medium	45069	CEBPD		MeFS					3.173	(1.085–9.277)	0.035
	Hsiao, Y. W.	2022		TNBC	28	stageⅠ-Ⅲ	H-score ≧ medium	44983	PTX3		MeFS					8.324	(1.589–43.608)	0.012	. Conditioned media from BCAFs exogenously expressing CEBPD or TGF-β1-treated BCAFs could enhance the migration and invasion of MDA-MB-231 cells,PTX3 is responsive to TGF-β1-induced CEBPD in BCAFs and contributes to promoting the migration, invasion and stemness of TNBC MDA-MB-231 cells.
High AUF1 level in stromal fibroblasts promotes carcinogenesis and chemoresistance and predicts unfavorable prognosis among locally advanced breast cancer patients	Al-Tweigeri, T.	2022	2006-2013	locally advanced breast cancer（LABC）	338	T2≥4 cm, T3 or T4, N0-N2, M0	≥ 10% of the stroma /HPF	86/252	AUF1	median follow-up time of 52. 6 months	OS	0.544	0.333–0.889	0.0151		0.95	(0.334–0.950)	0.0315	AUF1 positivity in cancer cells showed association with poor OS and DFS of ER+/Her2+ patients ； This suggests that breast fibroblasts that express high level of AUF1 can enhance the EMT process in BC cells in a paracrine manner；BSFs that express high level of AUF1 have the capacity to promote EMT and stemness, two pro-metastatic processes, in breast cancer cells both ER+ and ER−. BSFs that expres…
	Al-Tweigeri, T.	2022		locally advanced breast cancer	338	T2≥4 cm, T3 or T4, N0-N2, M1	≥ 10% of the stroma /HPF	86/252	AUF1	median follow-up time of 52. 6 months	DFS	0.705	0.484–1.026	0.0677		0.634	(0.634–0.426)	0.0249
High DNMT1 Expression in Stromal Fibroblasts Promotes Angiogenesis and Unfavorable Outcome in Locally Advanced Breast Cancer Patients	Al-Kharashi, L. A.	2022	2006- 2013	locally advanced breast cancer	100	T2-T4,Tx	≥ 10% of the stroma /HPF	68/32	DNMT1	median fellow up time of 52. 6 months	OS	0.421	0.141-1.255	0.01204		0.661	(0.119-3.673)	0.036	the role of DNMT1 in promoting the paracrine proangiogenic effect of breast stromal fibroblasts in vivo.
	Al-Kharashi, L. A.	2022		locally advanced breast cancer	100	T2-T4,Tx	≥ 10% of the stroma /HPF	68/32	DNMT1	median fellow up time of 52. 6 months	DFS	0.581	0.353-0.955	0.0322		0.426	(0.308-0.998)	0.0492
Prognostic significance of PD-L1-positive cancer-associated fibroblasts in patients with triple-negative breast cancer	Yoshikawa, K.	2021	2006 -2018	TNBC	61	N0-N3	the presence of CAFs with staining intensities of + 1 and + 2 in more than 1% of a section and positive immunoreactivity of ≥1 from the same patient	34/27	PD-L1（low）	NR	OS	0.297	0.093–0.948	0.04		0.198	0.044–0.891	0.035	CAF PD-L1 expression was an independent factor for a better prognosis of patients with TNBC
Metastasis Risk Assessment Using BAG2 Expression by Cancer-Associated Fibroblast and Tumor Cells in Patients with Breast Cancer	Yoon, C. I.	2021	1992 - 2015	BC	310	stageⅠ-Ⅲ	IHC score 1+ to 3+	67/243	BAG2	median fellow up time of 111 (6-325) months	DMFS	1.788	1.021–3.133	0.042		1.584	(0.886–2.832)	0.121	Positive BAG2 expression in CAF was significantly associated with decreased DMFS
Podoplanin expression in cancer-associated fibroblasts predicts unfavorable prognosis in node-negative breast cancer patients with hormone receptor-positive/HER2 - negative subtype	Tanaka, Y.	2021	2008-2014	HR+ /HER2- Lymph node negative invasive carcinoma	304	NR	more than 10% of CAFs showed immunoreactivity with podoplanin as strong as that of internal positive controls	27/142	PDPN	median fellow up time of 80.0(5-143) months	DFS	3.38	1.310–8.722	0.012	7				podoplanin-positive status in CAFs correlated with shorter disease-free survival (DFS)
	Tanaka, Y.	2021		HR+ /HER2- Lymph node negative invasive carcinoma	304	NR	more than 11% of CAFs showed immunoreactivity with podoplanin as strong as that of internal positive controls	27/142	PDPN	median fellow up time of 80.0 (5-143) months	DSS	27.016	3.249–224.658	0.002		37.759	3.363–423.93	0.003
Breast cancer stromal clotting activation (Tissue Factor and thrombin): A pre-invasive phenomena that is prognostic in invasion	Shaker, H.	2020	August 2010 and July 2014.	invasive breast cancer	182	NR	Fibroblast expression > 80%	34/148	Tissue Factor(TF)	Median follow-up from diagnosis was 62 (range 8-80) months	OS	1.05	1.007 – 1.09	0.02		1.035	(1.001 – 1.07)	0.041
	Shaker, H.	2020		invasive breast cancer	137	NR	Fibroblast expression > 70%	34/103	Thrombin	Median follow-up from diagnosis was 62 (range 8-80) months	OS	1.02	0.99-1.04	0.21		1.02	0.98-1.02)
	Shaker, H.	2020		invasive breast cancer	172	NR	Fibroblast expression > 60%	61/111	PAR1	Median follow-up from diagnosis was 62 (range 8-80) months	OS	1.2	0.42-3.73	0.68		1.003	(0.98-1.02	0.76	fibroblast expression was associated with reduced OS (P = .02) and DFS (P = .04).
	Shaker, H.	2020		invasive breast cancer	172	NR	Fibroblast expression > 60%	75/97	PAR2	Median follow-up from diagnosis was 62 (range 8-80) months	OS	1.06	0.34-3.29	0.91		0.99	(0.971-1.02)
Clinical and functional significance of tumor/stromal ATR expression in breast cancer patients	Al-Ansari, M. M.	2020	2006-2013	locally advanced breast cancer	103	T2-T4,Tx	Immunostaining positive cells＞11%	NR	ATR（low）	median fellow up time of 52.6 months	OS	7.934	2.950–21.340	0.0001		14.708	2.693–80.332	0.0019	t absence or reduced ATR expression in tumoral cells and their adjacent stromal fibroblasts is correlated with poor overall survival as well as disease-free survival
	Al-Ansari, M. M.	2020		locally advanced breast cancer	103	T2-T4,Tx	Immunostaining positive cells＞11%	NR	ATR（low）	median fellow up time of52.6 months	DFS	0.406	0.198–0.833	0.014		0.369	0.151–0.900	0.0285	This pro-proliferative effect of ATR-deficient cells was confirmed by immunostaining showing an increase in the staining of Ki-67 and cyclin D1 in the epithelium adjacent to N64-sh cells as compared to control
Impact of Epithelial-Stromal Interactions on Peritumoral Fibroblasts in Ductal Carcinoma in Situ	Strell, C.	2019	1986 and 2004	DCIS	351	NR	IHC score > 2	68/283	PDGFR-α	NR	DFS	0.85	0.49 -1.49	0.57	7	0.95	(0.51 - 1.77)	0.87	the PDGFRa(low)/PDGFRb(high) subset showed a statistically significantly worse prognosis
Impact of Epithelial-Stromal Interactions on Peritumoral Fibroblasts in Ductal Carcinoma in Situ	Strell, C.	2019		DCIS	360	NR	IHC score > 2	202/158	PDGFR-β	NR	DFS	1.37	0.90-2.08	0.14		1.41	(0.88 - 2.24)	0.15
MMP11 expression in intratumoral inflammatory cells in breast cancer	Eiro, N.	2019	1991 and 2012	invasive breast carcinoma	246	T1 or T2	>10% positive cells	175/71	MMP11	a minimum follow-up of ten years	RFS	3.01	1.84-4.92	＜0.001	8				MMP11 expression in stromal cells was significantly associated with prognosis
Cancer-Associated Fibroblasts Correlate with Tumor-Associated Macrophages Infiltration and Lymphatic Metastasis in Triple Negative Breast Cancer Patients	Zhou, J.	2018	-2016	TNBC	278	NR	Immunostaining intensity × Response rate score 2-9	146/132	FAP	median fellow up time of 87 (range 8-130) months	DFS				7	2.501	1.532-4.082	0.003	Compared with those with low expressions of CAFs markers, patients with high expressions had a disadvantageous DFS and DSS (P<0.001).
	Zhou, J.	2018		TNBC	278	NR	Immunostaining intensity × Response rate score 2-9	146/132	FAP	median fellow up time of 87(range 8-130) months	DSS					3.044	1.799-5.151	<0.001
	Zhou, J.	2018		TNBC	278	NR	Immunostaining intensity × Response rate score 2-9	140/138	α-SMA	median fellow up time of 87(range 8-130) months	DFS					2.477	1.218-5.037	0.01
	Zhou, J.	2018		TNBC	278	NR	Immunostaining intensity × Response rate score 2-9	140/138	α-SMA	median fellow up time of 87(range 8-130) months	DSS					2.831	1.373-5.837	0.003
Tenascin C is a prognostic determinant and potential cancer-associated fibroblasts marker for breast ductal carcinoma	Yang, Z.	2017		breast ductal carcinoma	150	NR	IHC score 2-3	84/66	TNC	median fellow up time of 68(range 2-108) months	OS	10.253	3.658–28.739	<0.001	8	8.478	2.956–24.320	<0.001	TNC and CAF markers (FSP1, SMA, Vimentin) positive expression was significantly shorter than negative group
	Yang, Z.	2017		breast ductal carcinoma	150	NR	IHC score 2-3	96/54	Vimentin	median fellow up time of 68(range 2-108) months	OS	0.67	0.31-1.42	0.049
	Yang, Z.	2017		breast ductal carcinoma	150	NR	IHC score 2-3	58/92	FSP-1	median fellow up time of 68(range 2-108) months	OS	0.44	0.22-0.88	<0.001
	Yang, Z.	2017		breast ductal carcinoma	150	NR	IHC score 2-3	108/42	α-SMA	median fellow up time of 68(range 2-108) months	OS	0.39	0.14-1.09	0.002
CD61+ and CAF+ were found to be good prognosis factors for invasive breast cancer patients	Cai, D.	2017	2007-2008	invasive breast cancer	164	stagesⅠ-Ⅲ	≥ 10% of the fibromatous tumor stroma	72/92	PDPN	median fellow up time of 42(range 1-84)	DFS				7	3.928	1.517-10.169	0.005
High ASMA(+) Fibroblasts and Low Cytoplasmic HMGB3(+) Breast Cancer Cells Predict Poor Prognosis	Amornsupak, K.	2017	2006-2011	invasive ductal carcinoma (IDC)	66	NR	IHC score ≥3	39/27	α-SMA	fellow up time of range 65.23-87.7 months	MFS	13.048	1.721-98.892	0.013	8	9.891	1.094-89.432	0.041	The MFS of patients with high ASMA expression was significantly lower than that of patients with low ASMA expression. ASMA expression could be considered as an independent prognostic factor of metastatic relapse in patients with breast cancer
Prognostic significance of S100A4-expression and subcellular localization in early-stage breast cancer	Egeland, E.V.	2016	1995–1998	Early-stage breast cancer	291	pT1N0- or pT2pN0G1	IHC >1% stained tumor cells	44/247	FSP-1	Median follow-up for 88.8 months (range 7.2–124.8)	MFS	0.37	0.17-0.79	0.321	8				S100A4-positive patients having significantly inferior outcome
	Egeland, E.V.	2016		Early-stage breast cancer	291	pT1N0- or pT2pN0G1	IHC >1% stained tumor cells	44/247	FSP-1	Median follow-up for 88.8 months (range 7.2–124.8)	OS	0.44	0.24-0.82	0.12
Expression of cancer-associated fibroblast-related proteins differs between invasive lobular carcinoma and invasive ductal carcinoma	Park, C. K.	2016	January 2000 to December 2012	invasive breast cancer	524	NR	IHC score ≥ 2	101/423	PDPN	NR	OS				8	2.103	0.888–4.980	0.091	higher T stage (hazard ratio 4.057, 95 % CI 1.683–9.779, p = 0.002), tumoral FSP-1/S100A4 positivity (hazard ratio 3.462, 95 % CI 1.414–8.479, p = 0.007), and stromal FSP-1/S100A4 negativity (hazard ratio 2.465, 95 % CI 1.113–5.461, p = 0.026) were independent factors associated with shorter DFS.
	Park, C. K.	2016		invasive breast cancer	524	NR	IHC score ≥ 2	101/423	PDPN	NR	DFS					3.462	1.414–8.479	0.007
	Park, C. K.	2016		invasive breast cancer	524	NR	IHC score ≥ 2	340/184	FSP-1	NR	DFS					2.465	1.113–5.461	0.026
	Park, C. K.	2016		invasive breast cancer	524	NR	IHC score ≥ 2	340/184	FSP-1	NR	OS					0.576	0.272–1.217	0.576
	Park, C. K.	2016		invasive breast cancer	642	NR	IHC score ≥ 2	153/489	PDGFR-β	NR	OS					1.71	(0.23-12.63)	0.448
	Park, C. K.	2016		invasive breast cancer	642	NR	IHC score ≥ 2	153/489	PDGFR-β	NR	DFS					1.72	(0.25-12.14)	0.528
Expression of CAF-Related Proteins Is Associated with Histologic Grade of Breast Phyllodes Tumor	Kim, H. M.	2016	2000 to 2010	Malignant phyllodes tumor	16	NR	IHC score > 1	45205	PDGFR-β	NR	OS	0.03	0.00-128.68	0.041	8				stromal expression of PDGFR𝛼 was associated with shorter overall survival
	Kim, H. M.	2016		Phyllodes tumor	349	NR	IHC score > 1	17/179	PDGFR-α	NR	OS	0.19	0.04-1.01	0.002	7
	Kim, H. M.	2016		Malignant phyllodes tumor	16	NR	IHC score > 1	45057	PDGFR-α	NR	OS	0.44	0.03-6.15	0.052
Prognostic significance of inflammatory factors expression by stroma from breast carcinomas	Fernandez-Garcia, B.	2016	1990-2001	early invasive breast cancer of ductal-type	98	T1 or T2	≥ 10% of the stroma /HPF	77/21	IL1(low)	The median follow-up period in patients without metastasis was of 138 months and 26 months in patients with metastatic disease.	OS	0.29	0.11-0.73	0.007
	Fernandez-Garcia, B.	2016		early invasive breast cancer of ductal-type	98	T1 or T2	≥ 10% of the stroma /HPF	77/21	IL1(low)	The median follow-up period in patients without metastasis was of 138 months and 26 months in patients with metastatic disease.	RFS	0.38	0.19-0.75	0.002
	Fernandez-Garcia, B.	2016		early invasive breast cancer of ductal-type	101	T1 or T2	≥ 10% of the stroma /HPF	57/44	IL10	The median follow-up period in patients without metastasis was of 138 months and 26 months in patients with metastatic disease.	OS	0.7	0.15-3.18	<0.001
	Fernandez-Garcia, B.	2016		early invasive breast cancer of ductal-type	101	T1 or T2	≥ 10% of the stroma /HPF	57/44	IL10	The median follow-up period in patients without metastasis was of 138 months and 26 months in patients with metastatic disease.	RFS	0.54	0.19-1.52	<0.001
Differential expression of cancer-associated fibroblast-related proteins according to molecular subtype and stromal histology in breast cancer	Park, S. Y.	2015	January 2000 to December 2006.	Breast cancer	642	T1-T3	IHC score ≥ 2	153/489	PDGFR-β	NR	OS	1.31	0.31-5.57		8
	Park, S. Y.	2015		Breast cancer	642	T1-T3	IHC score ≥ 2	153/489	PDGFR-β	NR	DFS	1.54	0.33-7.32
	Park, S. Y.	2015		Luminal B	152	T1-T3	IHC score ≥ 2	5/147	FAP-α	NR	OS	0.01	0.00-3.52	0.018
	Park, S. Y.	2015		Invasive breast cancer	642	T1-T3	IHC score ≥ 2	189/453	FSP-1	NR	OS	0.5	0.24-1.02	0.016
	Park, S. Y.	2015		Invasive breast cancer	642	T1-T3	IHC score ≥ 2	189/453	FSP-1	NR	DFS	0.98	0.46-2.11	0.015
	Park, S. Y.	2015		Luminal A	275	T1-T3	IHC score ≥ 2	40/235	PDPN	NR	OS	0.16	0.02-1.57	0.002
CD105 Expression on CD34-Negative Spindle-Shaped Stromal Cells of Primary Tumor Is an Unfavorable Prognostic Marker in Early Breast Cancer Patients	Martinez, L. M.	2015		Early-stage breast cancer	53	NR	≥ 10% of the stroma /HPF	23/30	FSP-1	NR	OS	0.32	0.01-10.42	0.04	6
Expression of cancer-associated fibroblast-related proteins in adipose stroma of breast cancer	Jung, Y. Y.	2015	January 1, 2000 and December 31, 2006	invasive ductal carcinoma	642		IHC score ≥ 2	23/619	PDGFR-β	68.3 ± 30.1	OS	1.68	0.27-10.65	0.729	7				Similar univariate analysis for breast cancer of fibrous stroma type identified tumor S100A4 positivity (p=0.015 and p= 0.016, respectively) to be significantly associated with shorter DFS and OS (Table 4 and Fig. 4).
	Jung, Y. Y.	2015		invasive ductal carcinoma	642		IHC score ≥ 2	23/619	PDGFR-β	68.3 ± 30.1	DFS	1.74	0.27-11.18	0.799
	Jung, Y. Y.	2015		invasive ductal carcinoma	642	stage Ⅰ-Ⅲ	IHC score ≥ 2	189/453	FSP-1	68.3 ± 30.1	OS	2.26	1.29-3.95	0.331
	Jung, Y. Y.	2015		invasive ductal carcinoma	642	stage Ⅰ-Ⅲ	IHC score ≥ 2	189/453	FSP-1	68.3 ± 30.1	DFS	2.53	1.40-4.59	0.371
A phenotype from tumor stroma based on the expression of metalloproteases and their inhibitors, associated with prognosis in breast cancer	Eiró, N.	2015		primary invasive ductal carcinoma	107	T1 or T2	≥ 10% of the stroma /HPF	46/61	TIMP-2	The median follow-up period in patients without metastasis was of 187 months, and 52 months in patients with metastatic disease.	RFS	5.1	3-8.8	<0.0001	7
	Eiró, N.	2015		primary invasive ductal carcinoma	107	T1 or T2	≥ 10% of the stroma /HPF	46/61	TIMP-2	The median follow-up period in patients without metastasis was of 187 months, and 52 months in patients with metastatic disease.	OS	4.4	2.3-8.2	<0.0001
	Eiró, N.	2015		primary invasive ductal carcinoma	106	T1 or T2	≥ 10% of the stroma /HPF	74/32	MMP11	The median follow-up period in patients without metastasis was of 187 months, and 52 months in patients with metastatic disease.	RFS	4	2-2.8	<0.0001
	Eiró, N.	2015		primary invasive ductal carcinoma	106	T1 or T2	≥ 10% of the stroma /HPF	74/32	MMP11	The median follow-up period in patients without metastasis was of 187 months, and 52 months in patients with metastatic disease.	OS	4	1.9-10	<0.0001
	Eiró, N.	2015		primary invasive ductal carcinoma	107	T1 or T2	≥ 10% of the stroma /HPF	57/50	MMP13	The median follow-up period in patients without metastasis was of 187 months, and 52 months in patients with metastatic disease.	RFS	1.7	1.04-3	<0.05
	Eiró, N.	2015		primary invasive ductal carcinoma	107	T1 or T2	≥ 10% of the stroma /HPF	57/50	MMP13	The median follow-up period in patients without metastasis was of 187 months, and 52 months in patients with metastatic disease.	OS	1.5	0.8-2.7	<0.05
	Eiró, N.	2015		primary invasive ductal carcinoma	107	T1 or T2	≥ 10% of the stroma /HPF	17/90	MMP9	The median follow-up period in patients without metastasis was of 187 months, and 52 months in patients with metastatic disease.	RFS	3.3	1.9-6	<0.0001
	Eiró, N.	2015		primary invasive ductal carcinoma	107	T1 or T2	≥ 10% of the stroma /HPF	17/90	MMP9	The median follow-up period in patients without metastasis was of 187 months, and 52 months in patients with metastatic disease.	OS	3.9	2-7.8	<0.0001
TGF-beta receptor type-2 expression in cancer-associated fibroblasts regulates breast cancer cell growth and survival and is a prognostic marker in pre-menopausal breast cancer	Busch, S.	2015	1986 to 1991	invasive breast cancer	123	NR	IHC score ≥ 2	81/42	TGFBR2(low)	NR	RFS	0.581	0.357-0.946	0.029		0.534	0.360-0.793	0.002	Low TGFBR2 expression in CAFs is associated with shortened recurrence-free survival in breast cancer.tumour growth is enhanced in the presence of TGFBR2 knockdown fibroblasts.
	Busch, S.	2015		invasive breast cancer	161	NR	IHC score ≥ 2	124/37	pSMAD2	NR	RFS	0.916	0.534-1.570	0.749
Absence of caveolin-1 expression in carcinoma-associated fibroblasts of invasive micropapillary carcinoma of the breast predicts poor patient outcome	Ren, M. J.	2014	January 2003 and August 2005	invasive micropapillary carcinoma (IMPC)	86	T1-T4,N0-N3	≥ 10% of the stroma /HPF	37/49	cavelin -1	median fellow up time of 64 (1-115) months	PFS	3.945	1.717-9.063	0.001		3.09	1.209–7.898	0.018	Absence of caveolin-1 expression in carcinoma-associated fibroblasts of invasive micropapillary carcinoma of the breast predicts poor patient outcome
Expression patterns of SDF1/CXCR4 in human invasive breast carcinoma and adjacent normal stroma: Correlation with tumor clinicopathological parameters and patient survival	Papatheodorou, H.	2014	1995 - 2006	invasive breast cancer	76	stageⅠ-Ⅳ	Immunostaining intensity score+staining percentage score 4-6		CXCR4	AverAverage follow-up time 6 months88个月	RFS					0.72	(0.64-0.82)	1.8e-0.7
	Papatheodorou, H.	2014		invasive breast cancer	76	stageⅠ-Ⅳ	Immunostaining intensity score+staining percentage score 4-6		CXCR4	AverAverage follow-up time 6 months88个月	OS					0.6	(0.47-0.77)	4e-0.5
Podoplanin expression in cancer-associated fibroblasts correlates with VEGF-C expression in cancer cells of invasive ductal breast carcinoma	Pula, B.	2013	1999-2002	invasive ductal breast carcinoma	104	NR	immunoreaction score ＞ 3	74/30	PDPN	followed up for 59.3 ± 38.8 months (range 1 – 125 months)	OS	2.082	0.7988 – 5.429	0.1335	6				Podoplanin expression in CAFs may have impact on angio- and lymphangiogenesis processes in IDC
Impact of different tumour stroma assessment methods regarding podoplanin expression on clinical outcome in patients with invasive ductal breast carcinoma	Pula, B.	2013	1999-2006	invasive ductal breast carcinoma	257	T1-T4,N0-N3	Immunoreactive score 6-12		PDPN	followed up for 63.21±38.54 (1-141) months.	OS	1.929	1.046-3.560	0.0355	7	0.6434	0.2184-1.894	0.4236	podoplanin expression in CAFs may be considered a possible marker of poor prognosis in IDC. higher podoplanin expression in CAFs was significantly associated with higher grade of malignancy and high proliferation rate of cancer cells measured by the expression of Ki-67 antigen.
	Pula, B.	2013		invasive ductal breast carcinoma	257	T1-T4,N0-N3	Immunoreactive score 6-12		PDPN	followed up for 63.21±38.54 (1-141) months.	EFS	0.3233	0.7860-2.075	0.3233
Diagnostic and Prognostic Relevance of MMP-11 Expression in the Stromal Fibroblast-Like Cells Adjacent to Invasive Ductal Carcinoma of the Breast	Min, K. W.	2013	2000-2005	invasive ductal breast carcinoma	192	stageⅠ-Ⅲ	Immunoreactive score >1	152/40	MMP11	NR	DFS	1.668	0.863–3.224	0.044	7				MMP-11 expression of stromal fibroblast-like cells was still significantly associated with poor prognosis
	Min, K. W.	2013		invasive ductal breast carcinoma	192	stageⅠ-Ⅲ	Immunoreactive score >1	152/40	MMP11	NR	OS	2.185	1.046–4.566	0.005
Podoplanin-expressing cancer-associated fibroblasts are associated with poor prognosis in invasive breast cancer	Schoppmann, S. F.	2012		Invasive breast cancer	367	stageⅠ-Ⅳ	≥ 10% of the stroma /HPF	33/334	PDPN	NR	OS				7	2.304	1.374–3.862	0.002
	Schoppmann, S. F.	2012		Invasive breast cancer	367	stageⅠ-Ⅳ	≥ 10% of the stroma /HPF	33/334	PDPN	NR	DFS					1.782	1.072–2.963	0.02
Role of stromal myofibroblasts in invasive breast cancer: stromal expression of alpha-smooth muscle actin correlates with worse clinical outcome	Yamashita, M. etal	2012	2000-2004	Invasive breast cancer	60	stageⅠ-Ⅲ	> 8.48 % of the spindle-shaped cells/field area	25/35	α-SMA	The average age of the patients with metastasis was 57.5 ± 15.1 years old, while those without metastasis was 56 ± 13.1 years old. The mean follow-up period was 74.8 ± 19.3 months.	OS	0.63	0.02-17.14	<0.001	6				stromal expression of alpha-smooth muscle actin correlates with worse clinical outcome. a-SMA and lymph node metastasis were identified as independent predictive factors of metastasis
	Yamashita, M. etal	2012		Invasive breast cancer	60	stageⅠ-Ⅲ	> 8.48 % of the spindle-shaped cells/field area	25/35	α-SMA	The average age of the patients with metastasis was 57.5 ± 15.1 years old, while those without metastasis was 56 ± 13.1 years old. The mean follow-up period was 74.8 ± 19.3 months.	DFS	0.3	0.04-2.23	<0.05
Low ERK phosphorylation in cancer-associated fibroblasts is associated with tamoxifen resistance in pre-menopausal breast cancer	Busch, S.	2012	1986 to 1991	Invasive breast cancer	367	N0-N3	Immunoreactive score 2-3	283/84	α-SMA	median follow-up time 69 months	RFS	1.381	0.730-2.612	0.321	7	2.738	1.080-6.945	0.034
Epithelial-mesenchymal interactions in breast cancer: evidence for a role of nuclear localized beta-catenin in carcinoma-associated fibroblasts	Verghese, E. T.	2011	1994 to 1997	BC	188	NR	Fibroblast count score 3	57/131	b-catenin	median follow-up time 108 months	OS	0.7	0.38-1.32	0.03					fibroblasts with nuclear b-catenin increase growth and invasion of breast cancer epithelial cells in vitro
	Verghese, E. T.	2011		BC	188	NR	Fibroblast count score 3	57/131	b-catenin	median follow-up time 108 months	DFS	0.51	0.22-1.15	0.025
	Verghese, E. T.	2011		grades 2 or 3 tumours	59	NR	Fibroblast count score 3	17/42	b-catenin	median follow-up time 108 months	DFS	0.09	0.00-65.01	0.85
	Verghese, E. T.	2011		grades 2 or 3 tumours	77	NR	Fibroblast count score 3	17/60	b-catenin	median follow-up time 108 months	DFS	1.52	0.55-4.19	0.5
Podoplanin expression by cancer-associated fibroblasts predicts poor outcome in invasive ductal breast carcinoma	Pula, B.	2011	1999–2002	invasive ductal carcinoma	117	T1-T4,N0-N3	≥ 10% of the stroma /HPF	96/21	PDPN	followed up for 58 ±38.55 months (range 1–125 months)	OS	0.3397	0.1365–0.8451	0.0202	8	0.7623	0.2666–17.2285	0.4757	It has recently been shown that podoplanin, a mucin-type glycoprotein, is expressed by cancer cells and cancer-associated fibroblasts (CAFs), and promotes cancer cell migration and invasiveness. podoplanin expression by CAFs was associated with poor patient outcome
	Pula, B.	2011		invasive ductal carcinoma	117	T1-T4,N0-N3	≥ 10% of the stroma /HPF	96/21	PDPN	followed up for 58 ±38.55 months (range 1–125 months)	DFS	0.5244	0.2450–1.122	0.0963
Prognostic Significance of Stromal Platelet-Derived Growth Factor beta-Receptor Expression in Human Breast Cancer	Paulsson, J.	2009	1988 -1992	Breast cancer	289	NR	IHC score 3	100/189	PDGFR-β	median follow-up time 106 (range 0 -207 months) months	RFS	1.67	1.08-2.58	0.02	8	1.38	(0.84-2.27)	0.2
Expression and prognostic significance of metalloproteases and their inhibitors in luminal A and basal-like phenotypes of breast carcinoma	Gonzalez, L. O.	2009	1990-2001	Luminal A	48	NR	IHC > median	26/22	TIMP-2	The median follow-up period was 84 months in patients without metastasis and 66 months in patients with metastasis.	RFS	4.8	1.9-11.9	<0.001	7
	Gonzalez, L. O.	2009		Basal like	48	NR	IHC > median	26/22	TIMP-2	The median follow-up period was 84 months in patients without metastasis and 66 months in patients with metastasis.	RFS	7.5	3.2-17.6	<0.001
	Gonzalez, L. O.	2009		Luminal A	48	NR	IHC > median	29/19	MMP-11	The median follow-up period was 84 months in patients without metastasis and 66 months in patients with metastasis.	RFS	4.9	1.6-14.9	<0.05
	Gonzalez, L. O.	2009		Basal like	45	NR	IHC > median	1934-11-01	MMP-11	The median follow-up period was 84 months in patients without metastasis and 66 months in patients with metastasis.	RFS	7.3	1.7-31.7
	Gonzalez, L. O.	2009		Luminal A	48	NR	IHC > median	22/26	MMP-13	The median follow-up period was 84 months in patients without metastasis and 66 months in patients with metastasis.	RFS	2.7	1.1-6.4	<0.05
	Gonzalez, L. O.	2009		Basal like	45	NR	IHC > median	27/18	MMP-13	The median follow-up period was 84 months in patients without metastasis and 66 months in patients with metastasis.	RFS	2.2	0.9-5.3	<0.05
	Gonzalez, L. O.	2009		Luminal A	48	NR	IHC > median	4/44	MMP-9	The median follow-up period was 84 months in patients without metastasis and 66 months in patients with metastasis.	RFS	3.1	1-9.2	<0.05
	Gonzalez, L. O.	2009		Basal like	45	NR	IHC > median	10/35	MMP-9	The median follow-up period was 84 months in patients without metastasis and 66 months in patients with metastasis.	RFS	3.9	1.7-8.8	<0.05
Tumor-derived Matrix Metalloproteinase-13 (MMP-13) correlates with poor prognoses of invasive breast cancer	Zhang, B.	2008		Invasive breast cancer	257	N0-N3	SI≥6	125/132	MMP-13	followed up for at least 36 months, up to 173 months	OS	0.995	0.786–1.259	0.146	7
Occurence of stromal myofibroblasts in the invasive ductal breast cancer tissue is an unfavourable prognostic factor	Surowiak, P. etal	2007	1997 to 1998	invasive ductal carcinoma	45	T1-T2,N0-N3,M0	IHC score 2-3	28/17	α-SMA	followed up≥ 96 months	DFS	6.28	1.08-36.36	0.0399	7
	Surowiak, P. etal	2007		invasive ductal carcinoma	45	T1-T2,N0-N3,M0	IHC score 2-3	28/17	α-SMA	followed up≥ 96 months	OS	1.23	0.17-0.79	0.0122
Stromal expression of fibroblast activation protein/seprase, a cell membrane serine proteinase and gelatinase, is associated with longer survival in patients with invasive ductal carcinoma of breast	Ariga, N.	2001	1984–1989	invasive ductal carcinoma	112	NR	≥ 10% of the stroma /HPF	61/51	FAP	NR	OS				6	0.19	0.05–0.67	0.01	Univariate analysis revealed that more abundant stromal expression of FAP/seprase was associated with longer overall and disease-free survival rates in patients with lymph node metastasis (Fig. 4c,d). , invasive ductal carcinomas with fewer stromal reactions expressing FAP/seprase may be more aggressive.
Stromal expression of fibroblast activation protein/seprase, a cell membrane serine proteinase and gelatinase, is associated with longer survival in patients with invasive ductal carcinoma of breast	Ariga, N.	2001		invasive ductal carcinoma	112		≥ 10% of the stroma /HPF	61/51	FAP		DFS					0.3	0.13–0.68	0.004
